# Supplementary material for: Metabotropic Glutamate Receptors 1 Regulates Rat Carotid Body Response to Acute Hypoxia via Presynaptic Mechanism
Source: PubMed Central journal article supplement (PMC8524001; doi:10.3389/fnins.2021.741214), 2021-10-05
Supplement: Data_Sheet_1.pdf [file Data_Sheet_1.pdf]

## Supplementary Material

*Table S1 Normality tests of the data of Figure 4B in the manuscript*

| <i>Tests of Normality</i> |                     |           |             |
|---------------------------|---------------------|-----------|-------------|
|                           | <i>Shapiro-Wilk</i> |           |             |
|                           | <i>Statistic</i>    | <i>df</i> | <i>Sig.</i> |
| <i>Before DHPG</i>        | <i>.841</i>         | <i>9</i>  | <i>.059</i> |
| <i>DHPG</i>               | <i>.932</i>         | <i>9</i>  | <i>.499</i> |
| <i>After DHPG</i>         | <i>.927</i>         | <i>9</i>  | <i>.450</i> |

*Table S2 Normality tests of the data of Figure 4D in the manuscript*

| <i>Tests of Normality</i> |                     |           |             |
|---------------------------|---------------------|-----------|-------------|
|                           | <i>Shapiro-Wilk</i> |           |             |
|                           | <i>Statistic</i>    | <i>df</i> | <i>Sig.</i> |
| <i>t1</i>                 | <i>.886</i>         | <i>9</i>  | <i>.180</i> |
| <i>t2</i>                 | <i>.884</i>         | <i>9</i>  | <i>.172</i> |
| <i>t3</i>                 | <i>.912</i>         | <i>9</i>  | <i>.327</i> |

*Table S3 Normality tests of the data of Figure 5B in the manuscript*

| <i>Tests of Normality</i> |                     |           |             |
|---------------------------|---------------------|-----------|-------------|
|                           | <i>Shapiro-Wilk</i> |           |             |
|                           | <i>Statistic</i>    | <i>df</i> | <i>Sig.</i> |
| <i>Before JNJ</i>         | <i>.976</i>         | <i>7</i>  | <i>.939</i> |
| <i>JNJ</i>                | <i>.907</i>         | <i>7</i>  | <i>.377</i> |
| <i>After JNJ</i>          | <i>.976</i>         | <i>7</i>  | <i>.940</i> |

*Table S4 Normality tests of the data of Figure 5D in the manuscript*

| <i>Tests of Normality</i> |                     |           |             |
|---------------------------|---------------------|-----------|-------------|
|                           | <i>Shapiro-Wilk</i> |           |             |
|                           | <i>Statistic</i>    | <i>df</i> | <i>Sig.</i> |
| <i>Before DHPG</i>        | <i>.850</i>         | <i>4</i>  | <i>.225</i> |
| <i>DHPG</i>               | <i>.907</i>         | <i>4</i>  | <i>.468</i> |
| <i>DHPG+JNJ</i>           | <i>.917</i>         | <i>4</i>  | <i>.522</i> |
| <i>After DHPG</i>         | <i>.875</i>         | <i>4</i>  | <i>.319</i> |

Table S5 Normality tests of the data of Figure 6 in the manuscript

| <i>Tests of Normality</i> |                     |           |             |
|---------------------------|---------------------|-----------|-------------|
|                           | <i>Shapiro-Wilk</i> |           |             |
|                           | <i>Statistic</i>    | <i>df</i> | <i>Sig.</i> |
| <i>Before DHPG</i>        | .798                | 5         | .078        |
| <i>DHPG</i>               | .854                | 5         | .208        |
| <i>DHPG+CGP52432</i>      | .833                | 5         | .147        |
| <i>After DHPG</i>         | .833                | 5         | .148        |
